# Supplementary material
Source: PubMed Central journal article supplement (PMC3773788)
Supplement: 1303558110_sapp.pdf [file 1303558110_sapp.pdf]

## Supporting Materials:

Aytes et al.

### ***ETV4* promotes metastasis in response to combined activation of PI3-kinase and Ras signaling in a mouse model of advanced prostate cancer**

#### Summary of Supporting Figures

Figure S1: Supplementary histopathological analyses of mouse prostate cancer phenotypes

Figure S2: Supplementary analyses of the gene expression profiling of *NPK* versus *NP* prostate tumors

Figure S3: Analyses of the EMT phenotype in *NPK* mice

Figure S4: Supplementary phenotypic analyses of metastases in the *NPK* mice

Figure S5: Supplementary molecular analyses of *ETS* gene expression and activation in prostate cancer

Figure S6: Supplementary analyses of *ETV4* target gene activity with *PI3-k* and *Ras* pathway activation in human prostate cancer metastases

#### Supporting Tables

Table S1: Summary of mouse phenotypic analyses

Table S2: Quantification of metastatic/disseminated tumor cells in the lungs and the bone marrow of *NPK* mice

Table S3: List of oligonucleotides used in this study

Table S4: List of antibodies used in this study

#### Supporting Datasets (*uploaded separately*)

Dataset S1: Differentially expressed genes comparing *NPK* vs *NP* prostate tumors ( $p < 0.0001$ )

Dataset S2: GSEA biological pathway analyses for *NPK* vs *NP* prostate tumors ( $p < 0.05$ )

Dataset S3: Genes in the leading edge of GSEA comparing *NPK* vs *NP* mouse prostate tumors with malignant vs indolent human prostate cancer signature

Dataset S4: Differentially expressed genes comparing 3-month vs 1-month *NPK* tumors ( $p < 0.001$ )

Dataset S5: Differential expression of ETV targets in *NPK* vs *NP* tumors and in 3 month vs 1 month *NPK* tumors

## Supporting Figures and Legends

### **Figure S1: Supplementary histopathological analyses of mouse prostate cancer phenotypes**

(A-F) Representative H&E images of sections from the ventral and dorsolateral prostate of mice of the indicated genotypes.

(G-V) Representative H&E images of sections from the anterior prostate of mice of the indicated genotypes. Images were captured on a whole slide scanner. The upper rows illustrate the low magnification (1-2X) configuration and the lower rows show a representative high magnification (20X) region. With the exception of the mouse indicated (corn oil), all other mice were induced with tamoxifen at 2 months of age. Following the classification system of Park 2002, pathological assessment was as follows: (G, H, K, L) within normal limits; (I, J, M, N) PIN 3 pattern with ducts filled with atypical cells. Panels O-V show the range of histopathology of *NPK* prostate tumors: (O, S): atypical epithelium (PIN III/IV) (P, T); more severe PIN (PIN IV) with invasion and areas of necrosis (Q, U); combination of atypical glandular and squamous epithelium; and (R, V) partially necrotic tumor mass, with a tumor composed of spindle cells.

Figure S1

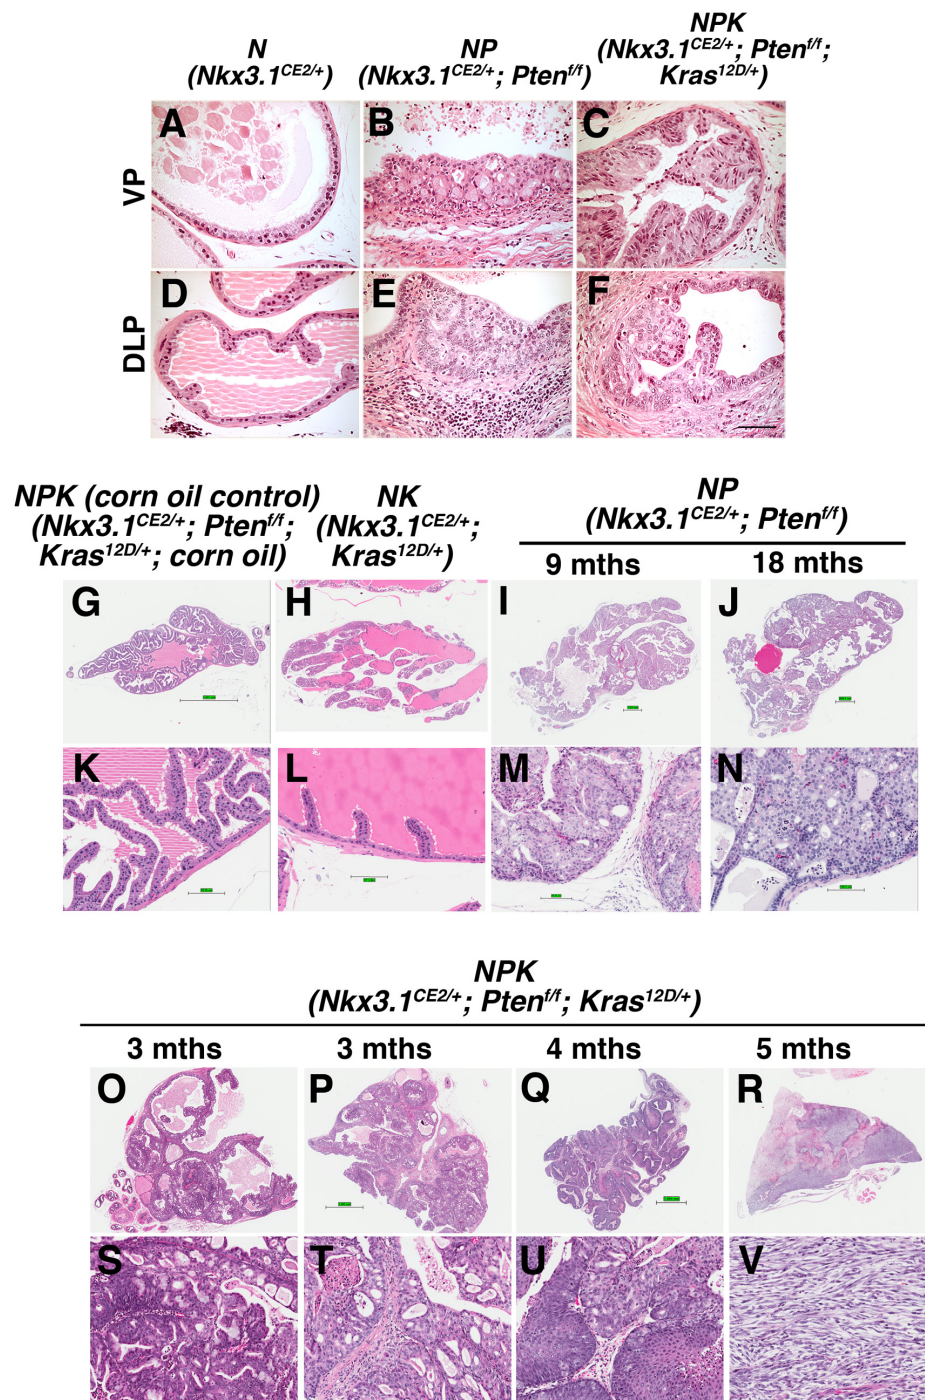

**Figure S2. Supplementary analyses of expression profiling of *NPK* vs *NP* prostate tumors**

(A) Pathway analyses. Heat map of differentially-expressed genes between the *NPK* versus *NP* mouse prostate tumors (t-test  $p$ -value 0.001) showing genes from selected pathways that are significantly enriched ( $p$  value of 0.001 to  $p = 0.004$ ).

(B) Real-time PCR analyses of selected differentially expressed genes between the *NPK* versus *NP* mouse prostate tumors with expression levels of mRNA represented as relative fold change.  $p$ -values compare the experimental to the control (wild-type prostate).

(C) Pathway analyses. Expression signatures from the *NPK* versus *NP* mouse prostate tumors were mapped to their human orthologs and annotated to biological processes using GSEA analyses. The total height of the curve indicates the extent of enrichment, with the normalized enrichment score (NES) and  $p$ -values indicated.

Figure S2

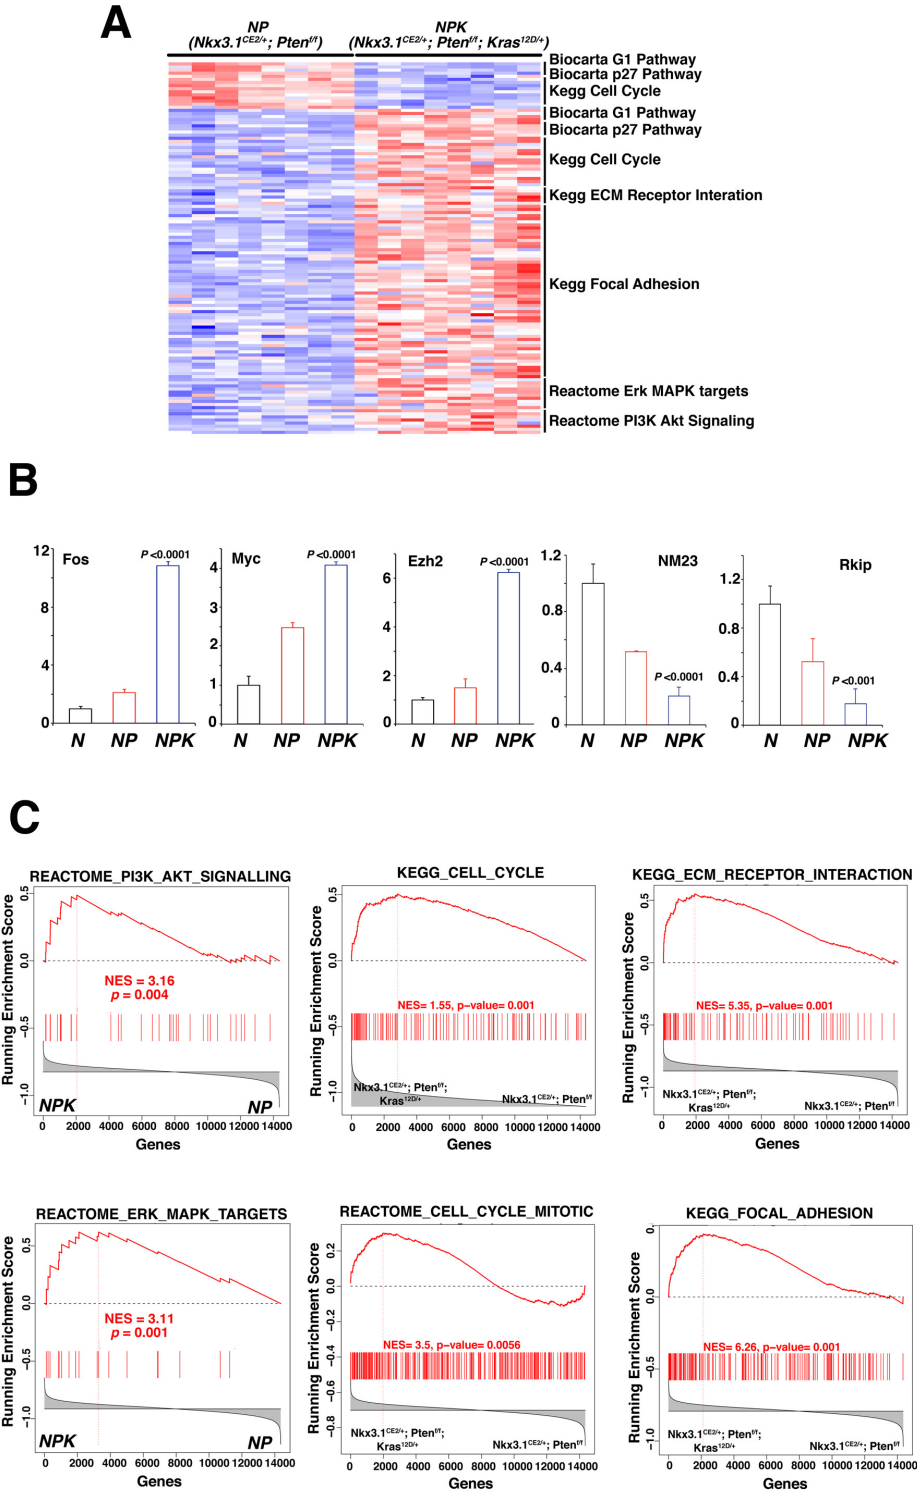

**Figure S3: Analyses of the EMT phenotype in *NPK* mice**

(A-C) Immunofluorescence images of E-Cadherin showing reduced staining in the *NPK* tumors. Scale bars represent 100  $\mu\text{m}$ . (D, E) Real-time PCR analyses of EMT markers with expression levels of mRNA represented as relative fold change. Panel D compares the *NPK* to the *NP* and *N* prostate/prostate tumors; *p*-values compare *NPK* tumors to the control (*N*, wild-type prostate). Panel E compares the 3-month to the 2 or 1-month *NPK* prostate tumors; *p*-values compare the 3-month *NPK* tumors to the 1-month *NPK* tumors.

Figure S3

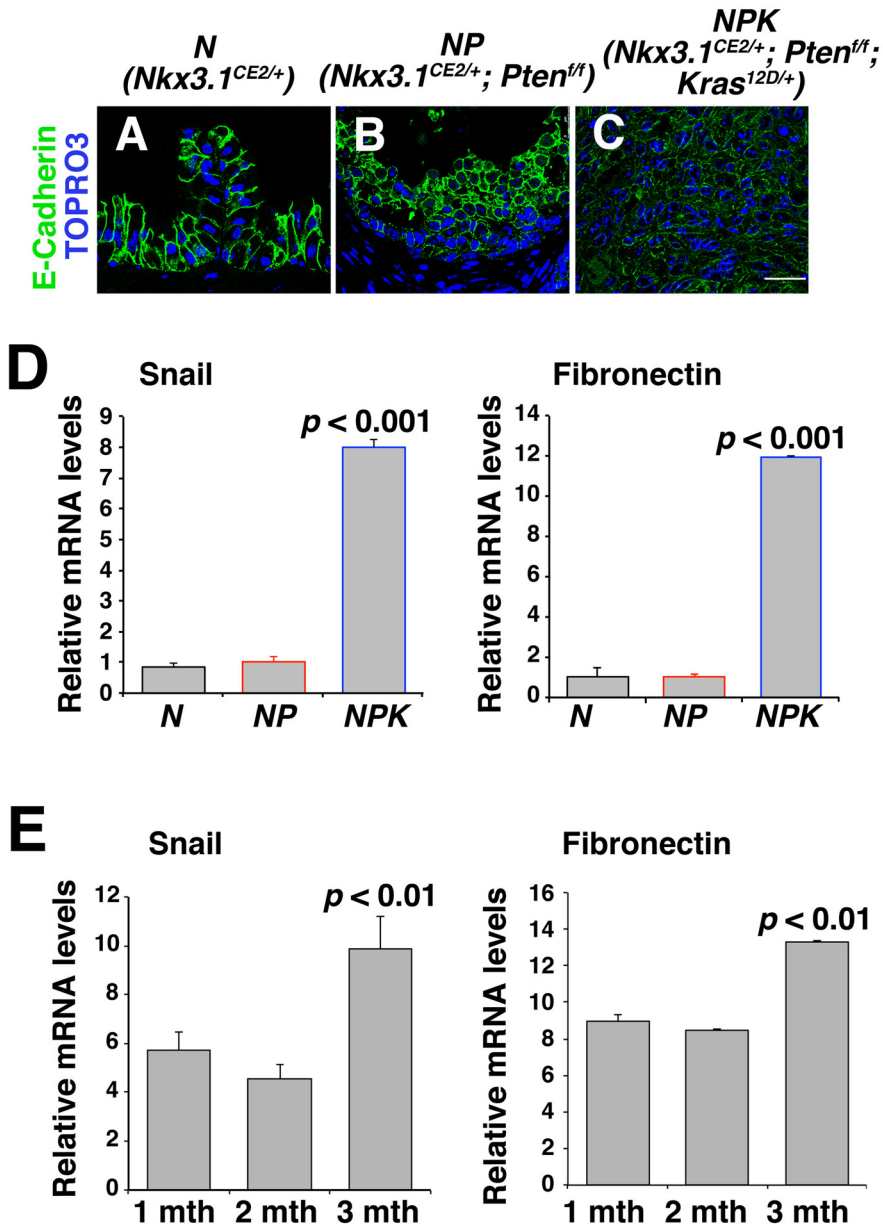

**Figure S4: Supplementary phenotypic analyses of metastases in the *NPk* mice**

(A-K) Additional analyses of metastasis as shown in main Figure 4.

(A-C) Whole slide scans of lymph nodes of mice of the indicated genotype.

(D-K) Analyses of lymph node metastases in *NPk* mice. Representative images from lumbar lymph nodes from mice of the indicated genotype showing H&E staining (E, D) or IHC staining for the relevant markers (F-K). Note that the tumor cells engulf the lymph node and are found throughout the tissue interspersed with the inflammatory cells.

(L-S) Additional analyses of the lineage-tracing study shown in main Figure 6. (L-O) Histological phenotype of *NPk-YFP* prostate tumors from mice induced with tamoxifen for the indicated times. (P-S) Representative confocal images of lymph nodes from *NPk-YFP* mice analyzed at the indicated time-points following tamoxifen induction. Images are shown for YFP (green) co-stained with CK8 (red) and visualized with DAPI (blue).



Figure S4

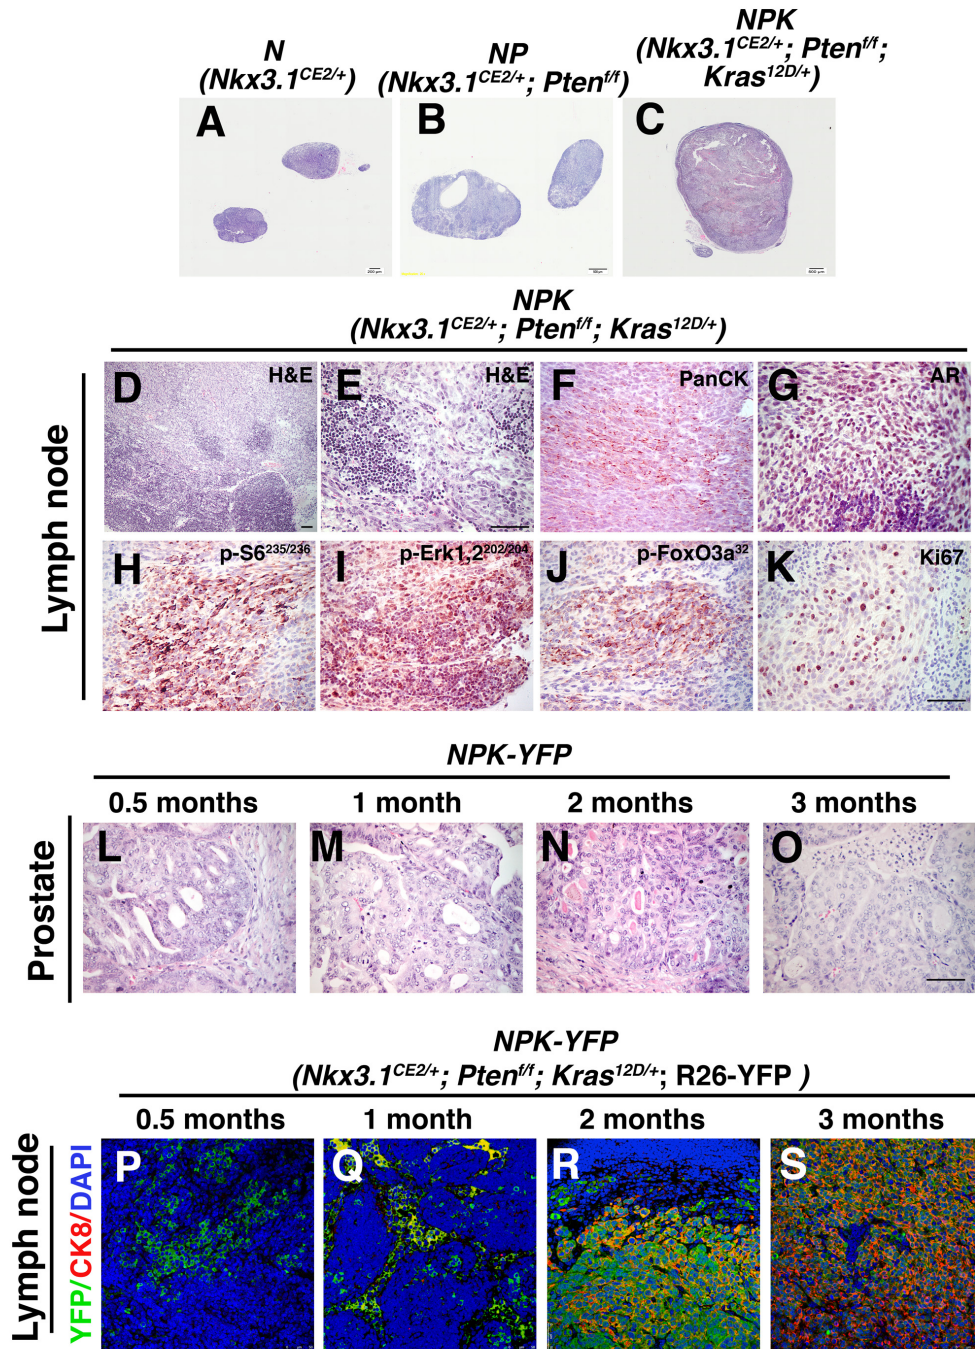

**Figure S5: Molecular analyses of *ETS* gene expression and activation in prostate cancer**

(A) GSEA analyses showing the lack of enrichment of human *ERG* target genes in reference signatures comparing *NPK* versus *NP* prostate tumors (*left*) as well as in 3-months versus 1-month *NPK* prostate tumors (*right*). Shown are the enrichment scores (NES) and *p*-values, which are not significant in either case. (B) Real-time PCR analyses showing the relative mRNA expression levels for *Erg*, *Etv1*, *Etv4*, and *Etv5* in *N*, *NP* and *NPK* prostate/prostate tumors; *p* values compare the experimental to the control (*N*, normal prostate). Only *Etv4* and *Etv5* are significant. (C) Correlation of the expression levels of the indicated *ETS* gene, *ERG*, *ETV1*, or *ETV5*, with PI3-kinase and Ras signaling in human prostate cancer in the Taylor dataset (Taylor et al, 2010) showing that none are correlated with PI3-kinase and Ras signaling. Shown are both Spearman Rho and Kendall z correlation coefficients. The color key indicates relative expression levels of *ETS* genes and PI3-k and Ras pathways.

Figure S5

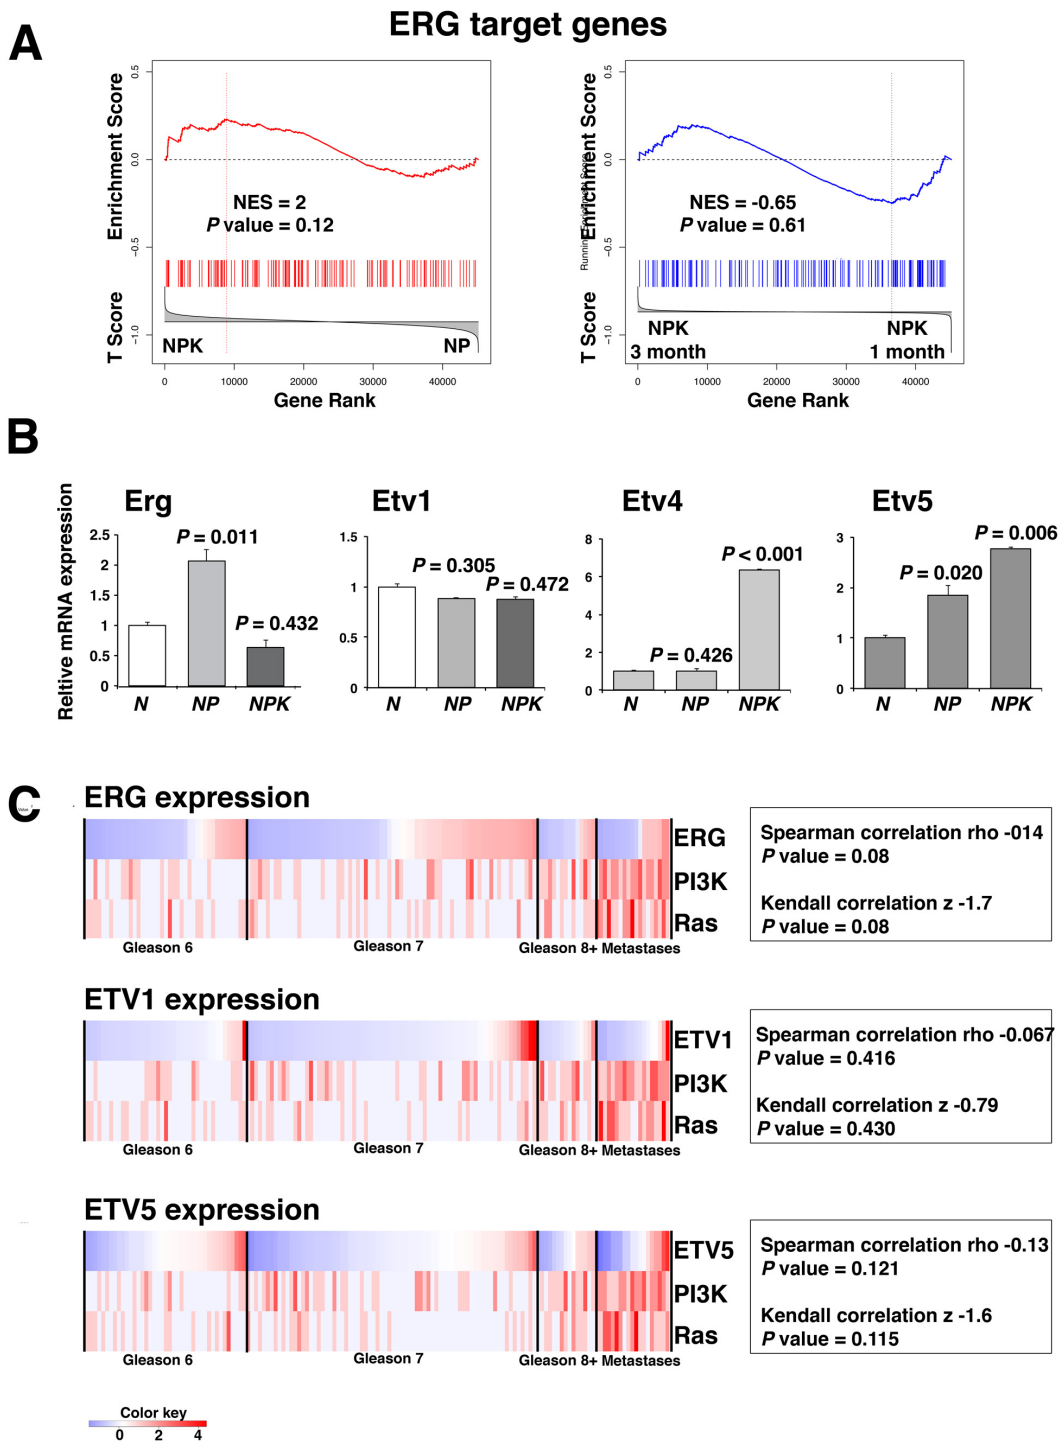

**Figure S6: Correlation of *ETV4* target gene activity with *PI3-k* and *Ras* pathway activation in human prostate cancer metastases**

Correlation of *ETV4* target gene activity with PI3-kinase and Ras signaling in human prostate cancer metastases from the Taylor dataset (Taylor et al, 2010) showing correlation particularly in bone and spine. The color key indicates relative expression levels of the pathways and activity levels of *ETV4*.

Figure S6

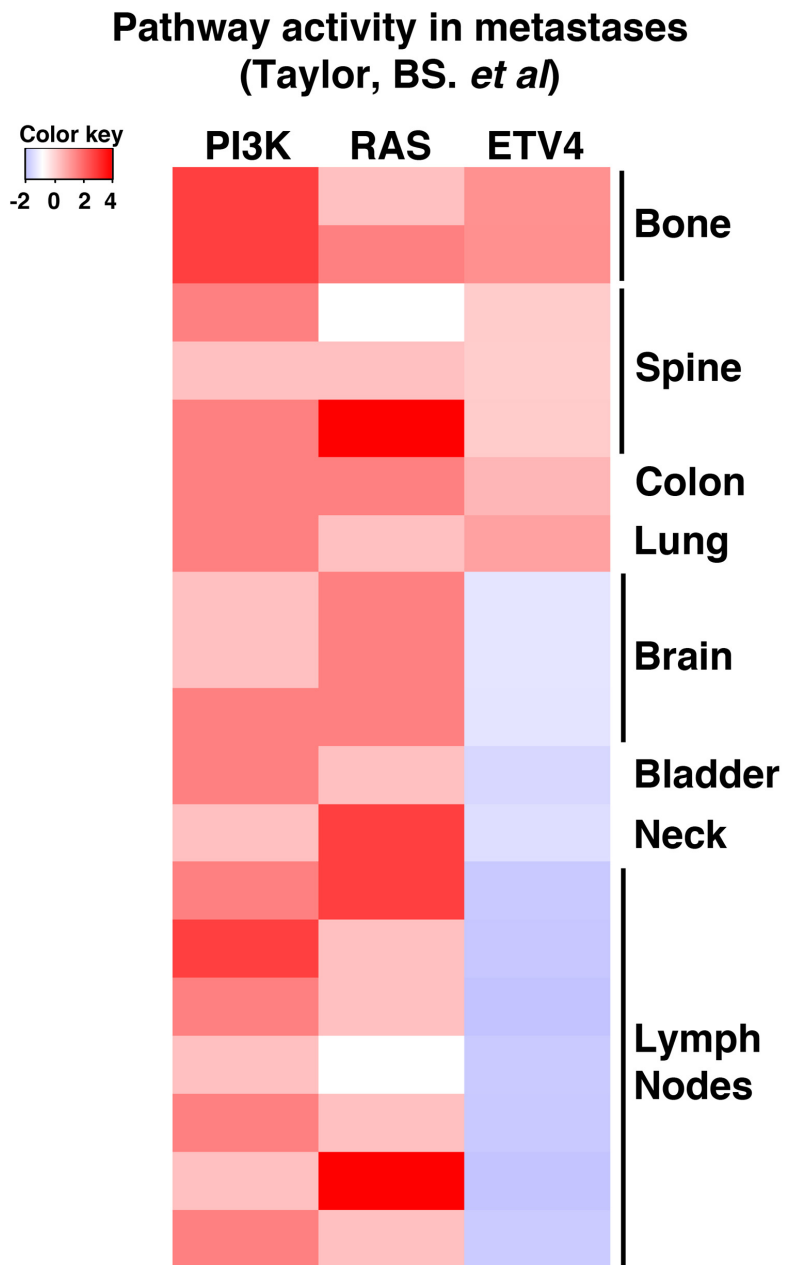

**Table S1: Summary of phenotypic analyses of mouse prostate tumors**

| Group                                        | Genotype                                                                              | N  | Age  | Phenotype                                                                                                   | 50% Survival                 | Weight (gms)                    | % KI67 cells            | Metastases |                  |       |       |
|----------------------------------------------|---------------------------------------------------------------------------------------|----|------|-------------------------------------------------------------------------------------------------------------|------------------------------|---------------------------------|-------------------------|------------|------------------|-------|-------|
|                                              |                                                                                       |    |      |                                                                                                             |                              |                                 |                         | Lymph node | Lung             | Liver | DTCs  |
| <i>Control group 1: N</i><br>(w/ Tamoxifen)  | Nkx3.1 <sup>CreERT2/+</sup> ;<br>Pten <sup>+/+</sup> ; Kras <sup>+/+</sup>            | 12 | 8    | Within normal limits                                                                                        | > 24 months                  | 0.1932 ± 0.20                   | ND                      | 0/5        | 0/5              | ND    | ND    |
| <i>Control group 2: NPK</i><br>(w/ Corn Oil) | Nkx3.1 <sup>CreERT2/+</sup> ;<br>Pten <sup>flox/flox</sup> ;<br>Kras <sup>12D/+</sup> | 12 | 4    | Within normal limits                                                                                        | > 24 months                  | 0.0346 ± 0.001                  | 3%                      | 0/5        | 0/5              | 0/5   | 0/5   |
| <i>NK</i>                                    | Nkx3.1 <sup>CreERT2/+</sup> ;<br>Pten <sup>+/+</sup> ;<br>Kras <sup>12D/+</sup>       | 6  | 8    | Within normal limits                                                                                        | > 24 months                  | 0.3057 ± 0.24                   | ND                      | ND         | ND               | ND    | ND    |
| <i>NP</i>                                    | Nkx3.1 <sup>CreERT2/+</sup> ;<br>Pten <sup>flox/flox</sup> ;<br>Kras <sup>+/+</sup>   | 18 | 9-12 | PIN III and PIN IV, with microinvasive adenocarcinoma and squamous papilloma                                | ~ 20 months                  | 0.4501 ± 0.18                   | 14%<br><i>p</i> <0.0001 | 0/5        | 0/10             | ND    | 1/12  |
|                                              |                                                                                       | 10 | 18+  | PIN III and PIN IV with microinvasive/invasive adenocarcinoma and squamous papilloma, squamound metaplasia. |                              | 2.9731 ± 3.9                    | ND                      | 0/5        | 0/6 <sup>f</sup> | ND    | 0/6   |
| <i>NPK</i>                                   | Nkx3.1 <sup>CreERT2/+</sup> ;<br>Pten <sup>flox/flox</sup> ;<br>Kras <sup>12D/+</sup> | 30 | 2-5  | Microinvasive/invasive adenocarcinoma with adenomatous, squamous, and spindle cell components               | 101 days<br><i>p</i> <0.0001 | 4.748 ± 4.0<br><i>p</i> <0.0001 | 38%<br><i>p</i> <0.0005 | 5/5        | 15/15            | 4/5   | 18/20 |

**Legend:** **N** is the total number of mice analyzed. **Age** refers to the time of analyses **after induction with tamoxifen** (or treatment with corn oil); mice were induced at 2 months of age. **Phenotype** refers to the pathological description of this histological phenotype according to the classification of Park et al. 2002; specific examples of histological phenotypes are shown in Figure S1. **Survival** refers either to the age at which 50% of the mice succumb to the disease. **Tissue metastases** were scored by analyses of H&E and with two IHC markers (AR and Pan-Cytokeratin). **Disseminated tumor cells** (DTCs) were evaluated from bone marrow using a PCR based assay. All *P* values compare the experimental group (as indicated) to the control group.

**Table S2. Quantification of metastatic/disseminated tumor cells in lungs and bone marrow of *NPK* mice**

| NPK-YFP mice (corn oil control) 4 months after delivery of corn oil |                          |                      |          |                      |                      |               |            |             |                                 |                  |                              |
|---------------------------------------------------------------------|--------------------------|----------------------|----------|----------------------|----------------------|---------------|------------|-------------|---------------------------------|------------------|------------------------------|
| Mouse                                                               | Cellular characteristics |                      |          |                      |                      | Proliferation |            |             | Disseminated tumor cells (qPCR) |                  |                              |
|                                                                     | Total cells counted      | YFP expressing cells |          | CK8 expressing cells |                      | Total YFP+    | YFP+ Ki67+ | % YFP+Ki67+ | Ct                              | $\Delta Ct^{\$}$ | $2e^{-\Delta\Delta Ct}^{\#}$ |
|                                                                     |                          | Total YFP+           | % YFP+   | Total YFP+/CK8+      | % YFP+ that are CK8+ |               |            |             |                                 |                  |                              |
| #1                                                                  | 987                      | 0                    | 0        | 0                    | 0                    | 0             | 0          | 0           | NV                              | NV               | 1                            |
| #2                                                                  | 424                      | 0                    | 0        | 0                    | 0                    | 0             | 0          | 0           | NV                              | NV               | 1                            |
| #3                                                                  | 795                      | 0                    | 0        | 0                    | 0                    | 0             | 0          | 0           | NV                              | NV               | 1                            |
| #4                                                                  | 685                      | 0                    | 0        | 0                    | 0                    | 0             | 0          | 0           | NV                              | NV               | 1                            |
| <b>Total</b>                                                        | <b>2891</b>              | <b>0</b>             | <b>0</b> | <b>0</b>             | <b>0</b>             | <b>0</b>      | <b>0</b>   | <b>0</b>    | <b>0</b>                        | <b>0</b>         | <b>1</b>                     |

| NP-YFP mice (6 Months after tamoxifen induction) |                          |                      |          |                      |                      |               |            |             |                               |              |                         |
|--------------------------------------------------|--------------------------|----------------------|----------|----------------------|----------------------|---------------|------------|-------------|-------------------------------|--------------|-------------------------|
| Mouse                                            | Cellular characteristics |                      |          |                      |                      | Proliferation |            |             | Disseminated tumor cells qPCR |              |                         |
|                                                  | Total cells counted      | YFP expressing cells |          | CK8 expressing cells |                      | Total YFP+    | YFP+ Ki67+ | % YFP+Ki67+ | Ct                            | $\Delta Ct$  | $2e^{-\Delta\Delta Ct}$ |
|                                                  |                          | Total YFP+           | % YFP+   | Total CK8+/ YFP+     | % YFP+ that are CK8+ |               |            |             |                               |              |                         |
| #1                                               | 569                      | 0                    | 0        | 0                    | 0                    | 0             | 0          | 0           | 25.52                         | -3.24        | 88.06958                |
| #2                                               | 489                      | 0                    | 0        | 0                    | 0                    | 0             | 0          | 0           | 25.52                         | -3.24        | 88.06958                |
| #3                                               | 238                      | 0                    | 0        | 0                    | 0                    | 0             | 0          | 0           | 25.81                         | -2.95        | 72.03229                |
| #4                                               | 468                      | 0                    | 0        | 0                    | 0                    | 0             | 0          | 0           | 25.71                         | -3.05        | 77.20229                |
| #5                                               | 394                      | 0                    | 0        | 0                    | 0                    | 0             | 0          | 0           | ND                            | ND           | ND                      |
| <b>Total</b>                                     | <b>2158</b>              | <b>0</b>             | <b>0</b> | <b>0</b>             | <b>0</b>             | <b>0</b>      | <b>0</b>   | <b>0</b>    | <b>25.64</b>                  | <b>-3.12</b> | <b>81.34343</b>         |

| NPK-YFP mice (0.5 Months after tamoxifen induction) |                          |                      |          |                      |                      |               |            |             |                                 |              |                         |
|-----------------------------------------------------|--------------------------|----------------------|----------|----------------------|----------------------|---------------|------------|-------------|---------------------------------|--------------|-------------------------|
| Mouse                                               | Cellular characteristics |                      |          |                      |                      | Proliferation |            |             | Disseminated tumor cells (qPCR) |              |                         |
|                                                     | Total cells counted      | YFP expressing cells |          | CK8 expressing cells |                      | Total YFP+    | YFP+ Ki67+ | % YFP+Ki67+ | Ct                              | $\Delta Ct$  | $2e^{-\Delta\Delta Ct}$ |
|                                                     |                          | Total YFP+           | % YFP+   | Total CK8+/ YFP+     | % YFP+ that are CK8+ |               |            |             |                                 |              |                         |
| #1                                                  | 575                      | 0                    | 0        | 0                    | 0                    | 0             | 0          | 0           | 27.61                           | -0.05        | 9.65028                 |
| #2                                                  | 239                      | 0                    | 0        | 0                    | 0                    | 0             | 0          | 0           | 27.45                           | -0.21        | 10.78214                |
| #3                                                  | 394                      | 0                    | 0        | 0                    | 0                    | 0             | 0          | 0           | 27.65                           | -0.01        | 9.38639                 |
| #4                                                  | 459                      | 0                    | 0        | 0                    | 0                    | 0             | 0          | 0           | 27.85                           | 0.19         | 8.17133                 |
| #5                                                  | 578                      | 0                    | 0        | 0                    | 0                    | 0             | 0          | 0           | 27.59                           | -0.12        | 19.51564                |
| <b>Total</b>                                        | <b>2245</b>              | <b>0</b>             | <b>0</b> | <b>0</b>             | <b>0</b>             | <b>0</b>      | <b>0</b>   | <b>0</b>    | <b>27.63</b>                    | <b>-0.04</b> | <b>9.49754</b>          |

| NPK-YFP mice (1 Months after tamoxifen induction) |                          |                      |           |                      |                      |               |            |             |                                 |                |                 |
|---------------------------------------------------|--------------------------|----------------------|-----------|----------------------|----------------------|---------------|------------|-------------|---------------------------------|----------------|-----------------|
| Mouse                                             | Cellular characteristics |                      |           |                      |                      | Proliferation |            |             | Disseminated tumor cells (qPCR) |                |                 |
|                                                   | Total cells counted      | YFP expressing cells |           | CK8 expressing cells |                      | Total YFP+    | YFP+ Ki67+ | % YFP+Ki67+ | Ct                              | ΔCt            | 2e-ΔΔCt         |
|                                                   |                          | Total YFP+           | % YFP+    | Total CK8+/YFP+      | % YFP+ that are CK8+ |               |            |             |                                 |                |                 |
| #1                                                | 1215                     | 12                   | 0.98777   | 7                    | 58.3333              | 7             | 0          | 0           | 26.36                           | -2.1575        | 41.58732        |
| #2                                                | 1715                     | 14                   | 0.8163    | 2                    | 14.2857              | 2             | 0          | 0           | 26.76                           | -1.7575        | 31.51729        |
| #3                                                | 1527                     | 9                    | 0.5894    | 1                    | 11.1111              | 1             | 0          | 0           | 27.06                           | -1.4575        | 25.6            |
| #4                                                | 958                      | 25                   | 2.6096    | 6                    | 24.0000              | 6             | 0          | 0           | 26.92                           | -1.5975        | 28.20877        |
| #5                                                | 850                      | 5                    | 0.5882    | 0                    | 0.0000               | 5             | 0          | 0           | ND                              | ND             | ND              |
| <b>Total</b>                                      | <b>6265</b>              | <b>65</b>            | <b>16</b> | <b>1.0375</b>        | <b>24.6154</b>       | <b>21</b>     | <b>0</b>   | <b>0</b>    | <b>26.775</b>                   | <b>-1.7425</b> | <b>31.72834</b> |

| NPK-YFP mice (2 Months after tamoxifen induction) |                          |                      |               |                      |                      |               |            |               |                                 |              |                 |
|---------------------------------------------------|--------------------------|----------------------|---------------|----------------------|----------------------|---------------|------------|---------------|---------------------------------|--------------|-----------------|
| Mouse                                             | Cellular characteristics |                      |               |                      |                      | Proliferation |            |               | Disseminated tumor cells (qPCR) |              |                 |
|                                                   | Total cells counted      | YFP expressing cells |               | CK8 expressing cells |                      | Total YFP+    | YFP+ Ki67+ | % YFP+Ki67+   | Ct                              | ΔCt          | 2e-ΔΔCt         |
|                                                   |                          | Total YFP+           | % YFP+        | Total CK8+/YFP+      | % YFP+ that are CK8+ |               |            |               |                                 |              |                 |
| #1                                                | 1450                     | 110                  | 7.5862        | 75                   | 68.1818              | 110           | 6          | 5.4545        | 25.27                           | -9.39        | 67.13090        |
| #2                                                | 1398                     | 15                   | 1.0730        | 8                    | 53.3333              | 15            | 2          | 13.3333       | 25.46                           | -9.20        | 58.84733        |
| #3                                                | 1243                     | 19                   | 1.5286        | 12                   | 63.1579              | 19            | 2          | 10.5263       | 25.59                           | -9.07        | 53.77654        |
| #4                                                | 978                      | 27                   | 2.7607        | 16                   | 59.2593              | 27            | 2          | 7.4074        | 25.52                           | -9.14        | 56.45014        |
| #5                                                | 2026                     | 230                  | 11.3524       | 210                  | 91.3043              | 230           | 9          | 3.9130        | 25.54                           | -9.29        | 67.91           |
| <b>Total</b>                                      | <b>7095</b>              | <b>401</b>           | <b>5.6519</b> | <b>321</b>           | <b>80.0499</b>       | <b>401</b>    | <b>21</b>  | <b>5.2369</b> | <b>25.476</b>                   | <b>-9.21</b> | <b>60.82298</b> |

| NPK-YFP mice (3 Months after tamoxifen induction) |                          |                      |                |                      |                      |               |            |                |                                 |              |                 |
|---------------------------------------------------|--------------------------|----------------------|----------------|----------------------|----------------------|---------------|------------|----------------|---------------------------------|--------------|-----------------|
| Mouse                                             | Cellular characteristics |                      |                |                      |                      | Proliferation |            |                | Disseminated tumor cells (qPCR) |              |                 |
|                                                   | Total cells counted      | YFP expressing cells |                | CK8 expressing cells |                      | Total YFP+    | YFP+ Ki67+ | % YFP+Ki67+    | Ct                              | ΔCt          | 2e-ΔΔCt         |
|                                                   |                          | Total YFP+           | % YFP+         | Total CK8+/YFP+      | % YFP+ that are CK8+ |               |            |                |                                 |              |                 |
| #1                                                | 1298                     | 473                  | 36.4407        | 459                  | 97.0402              | 694           | 171        | 24.6398        | 24                              | -4.52        | 213.86727       |
| #2                                                | 625                      | 163                  | 26.0800        | 154                  | 94.4785              | 997           | 158        | 15.8475        | 23.96                           | -4.56        | 219.8798        |
| #3                                                | 2025                     | 728                  | 35.9506        | 695                  | 95.4670              | 897           | 259        | 28.8740        | 23.9                            | -4.62        | 229.21726       |
| #4                                                | 1325                     | 325                  | 24.5283        | 307                  | 94.4615              | 162           | 31         | 19.1358        | 23.49                           | -5.03        | 304.55772       |
| #5                                                | 1527                     | 498                  | 32.6130        | 454                  | 91.1647              | -             | -          | -              | 23.51                           | -5.01        | 300.36479       |
| <b>Total</b>                                      | <b>6800</b>              | <b>2187</b>          | <b>32.1618</b> | <b>2069</b>          | <b>94.6045</b>       | <b>2750</b>   | <b>619</b> | <b>22.5091</b> | <b>23.772</b>                   | <b>-4.80</b> | <b>263.5049</b> |



**Legend:** For quantification of immunofluorescence, total cell number were determine by counting DAPI-stained nuclei; YFP+ cells were determined by counting GFP-stained cells; CK8+ cells were determined by counting CK8-stained cells. For quantification of disseminated tumor cells, the deleted *Pten*<sup>ff</sup> allele (recombined only in tumor cells) was quantified by qPCR and the fold of enrichment to *Gapdh* calculated using the relative  $\Delta\Delta\text{Ct}$  method.

<sup>§</sup>  $\Delta\text{Ct}$  refers to the difference between the qPCR cycle data for the *Pten*<sup>ff</sup> allele and the *Gapdh* normalization control.

<sup>#</sup>  $2e^{-\Delta\Delta\text{Ct}}$  refer to fold of enrichment of the *Pten*<sup>floxed/floxed</sup> versus *Gapdh*.

NV refers to no value data-point

ND refers to not determined.

**Table S3: List of the oligonucleotides used in this study**

| <b>Purpose and name</b>                    | <b>Sequence</b>                        |                         |
|--------------------------------------------|----------------------------------------|-------------------------|
| <b>Genotyping Allele</b>                   | <b>Forward</b>                         | <b>Reverse</b>          |
| <i>Nkx3.1</i> <sup>CreERT2/+</sup>         | CAGATGGCGCGGCAACACC                    | GCGCGGTCTGGCAGTAAAAAC   |
| <i>Pten</i> <sup>flox/flox</sup>           | ACTCAAGGCAGGGATGAGC                    | GTCATCTTCACTTAGCCATTGG  |
| <i>Kras</i> <sup>LSL-G12D/+</sup>          | CCTTTACAAGCGCACGCAGACTGTAGA            | GTCGACAAGCTCATGCGGGTG   |
| R26R <sup>LSL-YFP/YFP</sup>                | Wild type allele -GCGAAGAGTTTGTCTCAACC | AAAGTCGCTCTGAGTTGTTAT   |
|                                            | Mutant allele - GGAGCGGGAGAAATGGATATG  |                         |
| <b>Real Time qPCR</b>                      | <b>Forward</b>                         | <b>Reverse</b>          |
| Snail                                      | CACACGCTGCCTTGTGTCT                    | GGTCAGCAAAGCACGGTT      |
| Fibronectin                                | ATGTGGACCCCTCCTGATAGT                  | GCCCAGTGATTTAGCAAAGG    |
| c-Fos                                      | CGGGTTTCAACGCCGACTA                    | TTGGCACTAGAGACGGACAGA   |
| Ezh2                                       | AGCACAAGTCATCCCGTTAAAG                 | AATTCTGTTGTAAGGGCGACC   |
| c-Myc                                      | ATGCCCTCAACGTGAACTTC                   | GTCGCAGATGAAATAGGGCTG   |
| Rkip                                       | CCAGCAGCATTTTCATGGGAC                  | TGGTGCCACTCCCTGAATTTG   |
| NM23                                       | AGGAGCACTACACTGACCTGA                  | GGTTGGTCTCTCCAAGCATCA   |
| Etv1                                       | GCAAGTGCCTTACGTGGTCA                   | GCTTCAGCAAGCCATGTTTCTT  |
| Etv4                                       | TGGAGAGCAGTGCCTTTACTC                  | TTGATGGCGATTTGTCTGGGG   |
| Etv5                                       | TCAGTCTGATAACTTGGTGCTTC                | GGCTTCCTATCGTAGGCACAA   |
| Erg                                        | ACCTCACCCCTCAGTCCAAA                   | TGGTCGGTCCCAGGATCTG     |
| <i>Pten</i> <sup>flox/flox</sup> (deleted) | ACTCAAGGCAGGGATGAGC                    | GCTTGATATCGAATTCCTGCAGC |
| Gapdh                                      | CTAGAGAGCTGACAGTGGGTAT                 | AGACGACCAATGCGTCCAAA    |
| <b>sRNA</b>                                | <b>Clone ID</b>                        | <b>Mature antisense</b> |
| Etv4 shRNA#1                               | V2LMM_256957                           | TTAAGGTCTGGCATAAGAG     |
| Etv4 shRNA#2                               | V3LMM_515851                           | TAGCAGCTGAGTCTGGCCA     |
| Scramble shRNA                             | RHS4346                                | -                       |

| <b>Table S4: List of antibodies for used in this study</b> |                       |                  |             |                         |            |                |
|------------------------------------------------------------|-----------------------|------------------|-------------|-------------------------|------------|----------------|
| <b>Antibody</b>                                            | <b>Company</b>        | <b>Catalog #</b> | <b>Type</b> | <b>Use and dilution</b> |            |                |
|                                                            |                       |                  |             | <b>IF</b>               | <b>IHC</b> | <b>Western</b> |
| Androgen Receptor                                          | Santa Cruz            | SC-816           | Rabbit      |                         | 1:500      |                |
| Cytokeratin 5                                              | Covance               | PRB-160P         | Rabbit      | 1:500                   |            |                |
| Cytokeratin 8                                              | Covance               | MMS-162P         | Mouse       | 1:500                   |            |                |
| Cytokeratin 8                                              | Abcam                 | ab14053          | Chicken     | 1:1000                  |            |                |
| E-Cadherin                                                 | BD Pharmingen         | 610181           | Mouse       | 1:3000                  |            |                |
| Ki67                                                       | Novacastra            | NCL-Ki67p        | Rabbit      |                         | 1:2000     |                |
| Ki67                                                       | DakoCytomation        | #M7249           | Rat         | 1:500                   |            |                |
| GFP                                                        | Roche                 | 11 814 460       | Mouse       | 1:1000                  |            |                |
| Pan Cytokeratin                                            | Dako                  | Z0622            | Rabbit      |                         | 1:200      |                |
| Phospho Akt (ser473)                                       | Cell Signaling        | 3787             | Rabbit      |                         | 1:50       |                |
| Phospho Akt (ser473)                                       | Cell Signaling        | 4060             | Rabbit      |                         |            | 1:1000         |
| Total Akt                                                  | Cell Signaling        | 9272             | Rabbit      |                         |            | 1:1000         |
| Phospho p44/42 MAPK (Erk1/2) (thr202/tyr204)               | Cell Signaling        | 4376             | Rabbit      |                         | 1:100      |                |
| Phospho p44/42 MAPK (Erk1/2) (thr202/tyr204)               | Cell Signaling        | 9101             | Rabbit      |                         |            | 1:1000         |
| Total p44/42 MAPK (Erk1/2)                                 | Cell Signaling        | 9102             | Rabbit      |                         |            | 1:1000         |
| Phospho S6 Ribosomal Protein (ser235/236)                  | Cell Signaling        | 2211             | Rabbit      |                         | 1:100      | 1:1000         |
| Total S6 Ribosomal Protein                                 | Cell Signaling        | 2217             | Rabbit      |                         |            | 1:1000         |
| Phospho-FoxO3a (ser318/321)                                | Cell Signaling        | 9465             | Rabbit      |                         |            | 1:1000         |
| ETV4                                                       | Lifespans Biosciences | LS-B1527         | Rabbit      |                         | 1:200      | 1:1000         |
